# Supplementary material for: Neuro-Axonal Damage and Alteration of Blood–Brain Barrier Integrity in COVID-19 Patients
Source: MDPI journal article supplement (doi:10.3390/cells11162480), 2022-08-10
Supplement: s1 [file s1]

**Table S1.** Plasma NfL levels on hospital admission, comorbidities and maximal ventilation needed during hospitalization in COVID-19 patients.

| Patient | Comorbidity                                             | Ventilation | Plasma NfL<br>(pg/mL) | CSF NfL<br>(pg/mL) | CSF MMP-2<br>(OD/mm <sup>2</sup> ) | CSF MMP-9<br>(OD/mm <sup>2</sup> ) |
|---------|---------------------------------------------------------|-------------|-----------------------|--------------------|------------------------------------|------------------------------------|
| 1       | none                                                    | VMK         | 29.9                  | 330                | 50.4                               | 11.0                               |
| 2       | diabetes                                                | NIV         | 83.9                  | 889                | 96.0                               | 19.1                               |
| 3       | arterial hypertension, cancer                           | AA          | 27.2                  | 622                | 87.1                               | 19.9                               |
| 4       | none                                                    | VMK         | -                     | 1591               | 79.0                               | 15.2                               |
| 5       | arterial hypertension, diabetes                         | NIV         | -                     | 7961               | 126.3                              | 11.5                               |
| 6       | chronic pulmonary disease                               | AA          | 19.8                  | 318                | -                                  | -                                  |
| 7       | cancer                                                  | IOT         | 90.3                  | 4998               | 80.3                               | 114.4                              |
| 8       | none                                                    | NIV         | 103.0                 | 18,555             | 92.4                               | 21.9                               |
| 9       | arterial hypertension, chronic pulmonary disease, renal | VMK         | -                     | 6661               | 84.3                               | 10.2                               |
| 10      | arterial hypertension, diabetes                         | NIV         | 59.5                  | 8497               | 84.5                               | 67.1                               |
| 11      | arterial hypertension, diabetes                         | IOT         | 96.7                  | 1720               | 88.5                               | 15.7                               |
| 12      | cancer                                                  | VMK         | -                     | 266                | 72.4                               | 15.6                               |
| 13      | none                                                    | AA          | 14.4                  |                    |                                    |                                    |
| 14      | none                                                    | NIV         | 21.8                  |                    |                                    |                                    |
| 15      | arterial hypertension                                   | NIV         | 14.2                  |                    |                                    |                                    |
| 16      | cancer                                                  | VMK         | 14.4                  |                    |                                    |                                    |
| 17      | none                                                    | AA          | 11.2                  |                    |                                    |                                    |
| 18      | none                                                    | IOT         | 28.6                  |                    |                                    |                                    |
| 19      | arterial hypertension                                   | AA          | 34.0                  |                    |                                    |                                    |
| 20      | none                                                    | NIV         | 27.1                  |                    |                                    |                                    |
| 21      | arterial hypertension                                   | NIV         | 41.4                  |                    |                                    |                                    |
| 22      | arterial hypertension, cardiovascular                   | NIV         | 22.3                  |                    |                                    |                                    |
| 23      | none                                                    | AA          | 27.6                  |                    |                                    |                                    |
| 24      | cardiovascular, cancer                                  | IOT         | 123                   |                    |                                    |                                    |
| 25      | chronic pulmonary disease                               | NIV         | 29.4                  |                    |                                    |                                    |
| 26      | none                                                    | VMK         | 26.7                  |                    |                                    |                                    |
| 27      | none                                                    | VMK         | 8.88                  |                    |                                    |                                    |
| 28      | none                                                    | VMK         | 20.9                  |                    |                                    |                                    |
| 29      | none                                                    | IOT         | 39.0                  |                    |                                    |                                    |
| 30      | none                                                    | AA          | 13.9                  |                    |                                    |                                    |
| 31      | arterial hypertension, cardiovascular                   | AA          | 29.0                  |                    |                                    |                                    |
| 32      | none                                                    | IOT         | 42.6                  |                    |                                    |                                    |
| 33      | cancer                                                  | NIV         | 76.4                  |                    |                                    |                                    |
| 34      | arterial hypertension                                   | NIV         | 10.3                  |                    |                                    |                                    |
| 35      | none                                                    | AA          | 10.2                  |                    |                                    |                                    |
| 36      | arterial hypertension                                   | NIV         | 10.9                  |                    |                                    |                                    |
| 37      | arterial hypertension                                   | AA          | 17.8                  |                    |                                    |                                    |
| 38      | none                                                    | AA          | 4.43                  |                    |                                    |                                    |
| 39      | none                                                    | IOT         | 16.8                  |                    |                                    |                                    |
| 40      | arterial hypertension                                   | NIV         | 86.3                  |                    |                                    |                                    |
| 41      | arterial hypertension, cancer                           | NIV         | 42.2                  |                    |                                    |                                    |
| 42      | arterial hypertension                                   | AA          | 4.96                  |                    |                                    |                                    |
| 43      | arterial hypertension                                   | NIV         | 59.0                  |                    |                                    |                                    |
| 44      | cardiovascular, diabetes                                | IOT         | 31.1                  |                    |                                    |                                    |
| 45      | none                                                    | VMK         | 32.5                  |                    |                                    |                                    |
| 46      | diabetes                                                | NIV         | 11.7                  |                    |                                    |                                    |

|    |                                                  |     |       |
|----|--------------------------------------------------|-----|-------|
| 47 | none                                             | NIV | 14.9  |
| 48 | arterial hypertension                            | IOT | 15.3  |
| 49 | arterial hypertension, chronic pulmonary disease | NIV | 28.1  |
| 50 | none                                             | AA  | 0.221 |
| 51 | none                                             | NIV | 36.4  |
| 52 | none                                             | AA  | 19.9  |
| 53 | none                                             | AA  | 15.1  |
| 54 | none                                             | AA  | 4.56  |
| 55 | none                                             | VMK | 39.3  |

NfL: neurofilament light chain, CSF: cerebrospinal fluid, MMP-2: matrix metalloprotease-2, MMP-9: matrix metalloprotease-9, OD: optical density, AA: ambient air, VMK: Venturi oxygen mask, NIV: noninvasive ventilation, IOT: invasive mechanical ventilation through orotracheal intubation.

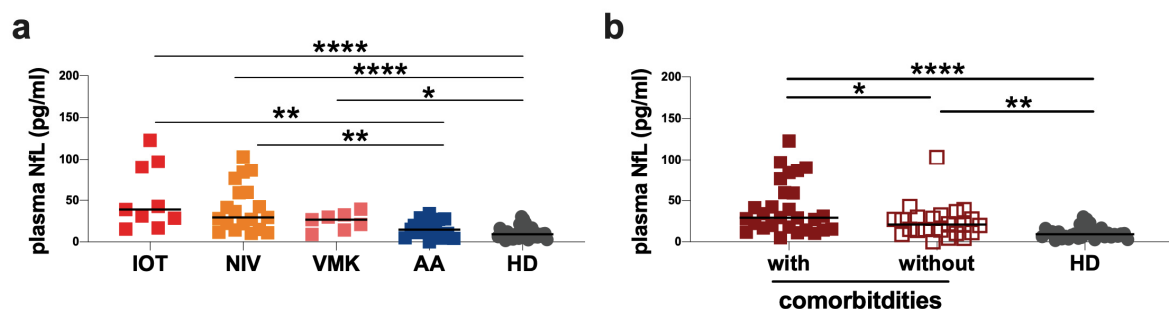

**Figure S1.** Evaluation of plasma NfL levels on hospital admission in COVID-19 patients stratified according to the presence of comorbidities and maximal ventilation needed during hospitalization. NfL: neurofilament light chain, AA: ambient air, VMK: Venturi oxygen mask, NIV: noninvasive ventilation, IOT: invasive mechanical ventilation through orotracheal intubation. \*\*\*\*:  $p < 0.0001$ ; \*\*:  $0.001 < p < 0.01$ ; \*:  $0.01 < p < 0.05$ .
